# Supplementary material for: LGB-Stack: Stacked Generalization with LightGBM for Highly Accurate Predictions of Polymer Bandgap
Source: PubMed Central journal article supplement — ACS Omega. 2022 Aug 15;7(34):29787–93. doi: 10.1021/acsomega.2c02554 (PMC9434625; doi:10.1021/acsomega.2c02554), 2022-08-15
Supplement: ao2c02554_si_001.pdf [file ao2c02554_si_001.pdf]

## SUPPORTING INFORMATION

### **LGB-Stack: Stacked Generalization with *LightGBM* for Highly Accurate Predictions of Polymer Bandgap**

Kai Leong Goh‡, Atsushi Goto\*, Yunpeng Lu\*

\* School of Chemistry, Chemical Engineering and Biotechnology, Nanyang Technological University, 50 Nanyang Ave, Singapore 639798, Singapore.

‡ First author

#### ***A. Tables of accuracy scores for the weak models molecular fingerprints***

All Fingerprints here are generated by RDKit.<sup>1</sup> All  $R^2$  and RMSE scores were computed using the *scikit-learn* package.<sup>2</sup> Group (A) fingerprints refer to those that were 4096 bits in size when generated by RDKit. Using, recursive feature elimination (RFE), the group (A) fingerprints were reduced to 256 and 512 bits and labelled groups (B) and (C) respectively.

**Table S1.** Best accuracy scores for the Avalon fingerprint (A-FP), with highest scores for  $R^2$  and lowest scores for RMSE.

| Fingerprint | $R^2$  |        | RMSE (eV) |        |
|-------------|--------|--------|-----------|--------|
|             | Train  | Test   | Train     | Test   |
| A-FP (A)    | 0.9404 | 0.8981 | 0.3544    | 0.4580 |
| A-FP (B)    | 0.9372 | 0.9008 | 0.3623    | 0.4522 |
| A-FP (C)    | 0.9399 | 0.8971 | 0.3563    | 0.4601 |

**Table S2.** Mean accuracy scores for A-FP.

| Fingerprint | $R^2$  |        | RMSE (eV) |        |
|-------------|--------|--------|-----------|--------|
|             | Train  | Test   | Train     | Test   |
| A-FP (A)    | 0.9359 | 0.8693 | 0.3657    | 0.5232 |
| A-FP (B)    | 0.9332 | 0.8750 | 0.3734    | 0.5115 |
| A-FP (C)    | 0.9351 | 0.8722 | 0.3680    | 0.5173 |

**Table S3.** Best accuracy scores for the Avalon Count fingerprint (AC-FP), with highest scores for  $R^2$  and lowest scores for RMSE.

| Fingerprint | $R^2$  |        | RMSE (eV) |        |
|-------------|--------|--------|-----------|--------|
|             | Train  | Test   | Train     | Test   |
| AC-FP (A)   | 0.9481 | 0.9030 | 0.3312    | 0.4467 |
| AC-FP (B)   | 0.9470 | 0.9032 | 0.3347    | 0.4463 |
| AC-FP (C)   | 0.9480 | 0.9031 | 0.3316    | 0.4465 |

**Table S4.** Mean accuracy scores for AC-FP.

| Fingerprint | $R^2$  |        | RMSE (eV) |        |
|-------------|--------|--------|-----------|--------|
|             | Train  | Test   | Train     | Test   |
| AC-FP (A)   | 0.9420 | 0.8737 | 0.3478    | 0.5143 |
| AC-FP (B)   | 0.9407 | 0.8782 | 0.3519    | 0.5050 |
| AC-FP (C)   | 0.9420 | 0.8755 | 0.3478    | 0.5107 |

**Table S5.** Best accuracy scores for the Layered fingerprint (L-FP), with highest scores for  $R^2$  and lowest scores for RMSE.

| Fingerprint | $R^2$  |        | RMSE (eV) |        |
|-------------|--------|--------|-----------|--------|
|             | Train  | Test   | Train     | Test   |
| L-FP (A)    | 0.9591 | 0.9058 | 0.2919    | 0.4401 |
| L-FP (B)    | 0.9543 | 0.9071 | 0.3110    | 0.4370 |
| L-FP (C)    | 0.9568 | 0.9124 | 0.3013    | 0.4243 |

**Table S6.** Mean accuracy scores for L-FP.

| Fingerprint | $R^2$  |        | RMSE (eV) |        |
|-------------|--------|--------|-----------|--------|
|             | Train  | Test   | Train     | Test   |
| L-FP (A)    | 0.9570 | 0.8779 | 0.2996    | 0.5056 |
| L-FP (B)    | 0.9510 | 0.8876 | 0.3198    | 0.4851 |
| L-FP (C)    | 0.9543 | 0.8852 | 0.3089    | 0.4901 |

**Table S7.** Best accuracy scores for the *RDKit* fingerprint (R-FP), with highest scores for  $R^2$  and lowest scores for RMSE.

| Fingerprint | $R^2$  |        | RMSE (eV) |        |
|-------------|--------|--------|-----------|--------|
|             | Train  | Test   | Train     | Test   |
| R-FP (A)    | 0.9656 | 0.9009 | 0.2689    | 0.4515 |
| R-FP (B)    | 0.9580 | 0.9073 | 0.2958    | 0.4365 |
| R-FP (C)    | 0.9617 | 0.9082 | 0.2825    | 0.4346 |

**Table S8.** Mean accuracy scores for R-FP.

| Fingerprint | $R^2$  |        | RMSE (eV) |        |
|-------------|--------|--------|-----------|--------|
|             | Train  | Test   | Train     | Test   |
| R-FP (A)    | 0.9626 | 0.8752 | 0.2792    | 0.5112 |
| R-FP (B)    | 0.9543 | 0.8871 | 0.3086    | 0.4863 |
| R-FP (C)    | 0.9585 | 0.8867 | 0.2943    | 0.4870 |

## B. Tables of accuracy scores for LGB-Stack

LGB-Stack uses the group “B” fingerprints for its first level of weak model training.

**Table S9.** Best accuracy scores for LGB-Stack.

| Model     | $R^2$  |        | RMSE (eV) |        | Train/Test split ratio |
|-----------|--------|--------|-----------|--------|------------------------|
|           | Train  | Test   | Train     | Test   |                        |
| LGB-Stack | 0.9874 | 0.8091 | 0.1627    | 0.6305 | 10/90                  |
|           | 0.9915 | 0.8497 | 0.1357    | 0.5537 | 20/80                  |
|           | 0.9885 | 0.8744 | 0.1570    | 0.5110 | 30/70                  |
|           | 0.9860 | 0.8826 | 0.1683    | 0.4947 | 40/60                  |
|           | 0.9821 | 0.8941 | 0.1911    | 0.4665 | 50/50                  |
|           | 0.9810 | 0.9078 | 0.2001    | 0.4354 | 60/40                  |
|           | 0.9783 | 0.9147 | 0.2115    | 0.4149 | 70/30                  |
|           | 0.9760 | 0.9197 | 0.2226    | 0.4081 | 80/20                  |
|           | 0.9746 | 0.9214 | 0.2295    | 0.4026 | 90/10                  |
|           | 0.9735 | 0.9420 | 0.2355    | 0.3410 | 95/5                   |

**Table S10.** Mean accuracy scores for LGB-Stack.

| Model     | $R^2$  |        | RMSE (eV) |        | Train/Test split ratio |
|-----------|--------|--------|-----------|--------|------------------------|
|           | Train  | Test   | Train     | Test   |                        |
| LGB-Stack | 0.9788 | 0.7911 | 0.2088    | 0.6607 | 10/90                  |
|           | 0.9865 | 0.8347 | 0.1674    | 0.5878 | 20/80                  |
|           | 0.9850 | 0.8557 | 0.1762    | 0.5495 | 30/70                  |
|           | 0.9827 | 0.8700 | 0.1895    | 0.5218 | 40/60                  |
|           | 0.9802 | 0.8785 | 0.2027    | 0.5049 | 50/50                  |
|           | 0.9784 | 0.8870 | 0.2119    | 0.4869 | 60/40                  |
|           | 0.9763 | 0.8915 | 0.2221    | 0.4769 | 70/30                  |
|           | 0.9747 | 0.8958 | 0.2296    | 0.4669 | 80/20                  |
|           | 0.9732 | 0.9008 | 0.2367    | 0.4541 | 90/10                  |
|           | 0.9727 | 0.9027 | 0.2391    | 0.4458 | 95/5                   |

## References

- (1) Landrum, G. RDKit: Open-Source Cheminformatics Software. <https://www.rdkit.org> (accessed Jan 11, 2022).
- (2) Pedregosa, F.; Varoquaux, G.; Gramfort, A.; Michel, V.; Thirion, B.; Grisel, O.; Blondel, M.; Prettenhofer, P.; Weiss, R.; Dubourg, V.; Vanderplas, J.; Passos, A.; Cournapeau, D.; Brucher, M.; Perrot, M.; Duchesnay, E. Scikit-learn: Machine Learning in Python. *J. Mach. Learn. Res.* **2011**, *12*(85), 2825–2830.
